# Supplementary figures and images for: On the structure and chemistry of iron oxide cores in human heart and human spleen ferritins using graphene liquid cell electron microscopy
Source: Royal Society of Chemistry journal article supplement (doi:10.1039/c9nr01541h), 2019-01-01

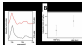

Supplement: c9nr01541h3.pdf [file c9nr01541h3.pdf]

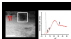

Supplement: c9nr01541h5.pdf [file c9nr01541h5.pdf]
